# Supplementary material for: Clinical impact of miR-223 expression in pediatric T-Cell lymphoblastic lymphoma
Source: PubMed Central journal article supplement (PMC5746112; doi:10.18632/oncotarget.22386), 2017-11-11
Supplement: oncotarget-08-107886-s001.pdf [file oncotarget-08-107886-s001.pdf]

# Clinical impact of miR-223 expression in pediatric T-Cell lymphoblastic lymphoma

## SUPPLEMENTARY MATERIALS

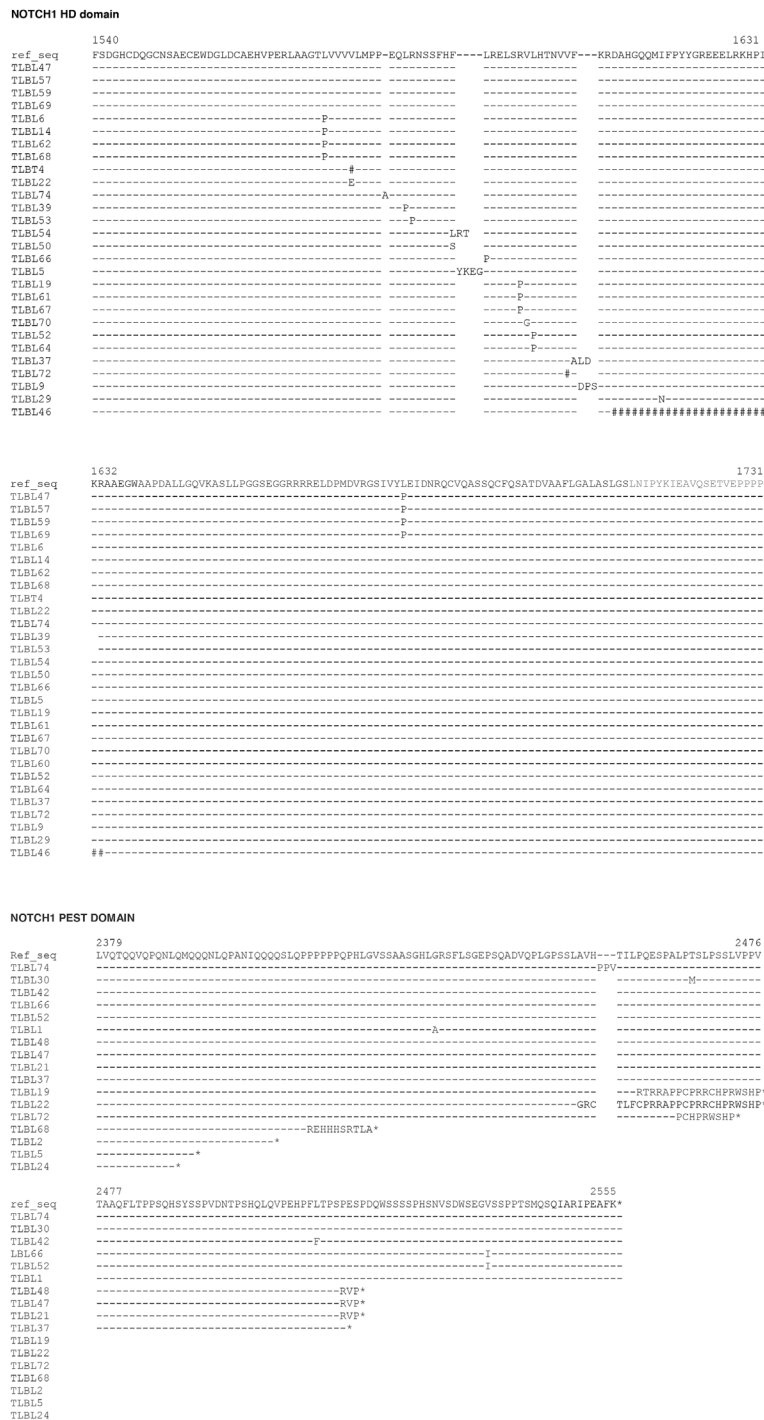

**Supplementary Figure 1: Multiple sequence alignment of NOTCH1 wild-type and variants identified in the present study.** Number of first and last depicted amino acids of reference sequence (ref\_seq) are indicated based on NP\_060087.3. Sequence differences caused by missense mutations, insertions or frame-shifts are shown. \* premature stop codon, # deleted position.

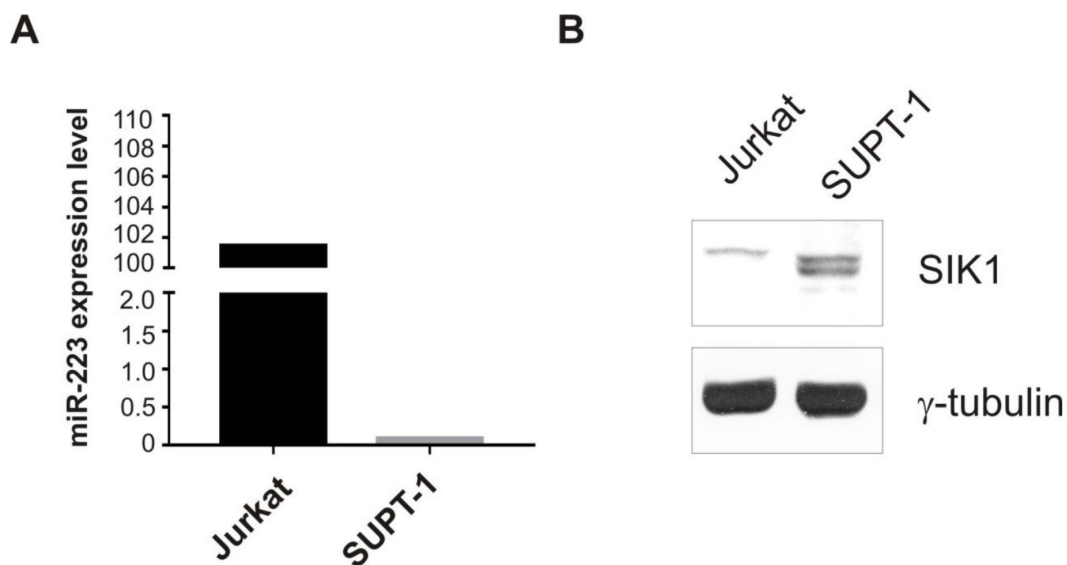

**Supplementary Figure 2: Endogenous expression of miR-223 and SIK-1 in SUPT-1 and Jurkat cell lines.** (A) Expression levels of miR-223 in Jurkat and SUPT-1 cell lines measured by qRT-PCR. Data have been calculated according to the comparative delta Ct method ( $2^{-\Delta\Delta C_t}$ ), using RNU6 as endogenous control. (B) Western blotting analysis of SIK-1 in Jurkat and SUPT-1 cell lines.  $\gamma$ -tubulin was used as loading control.

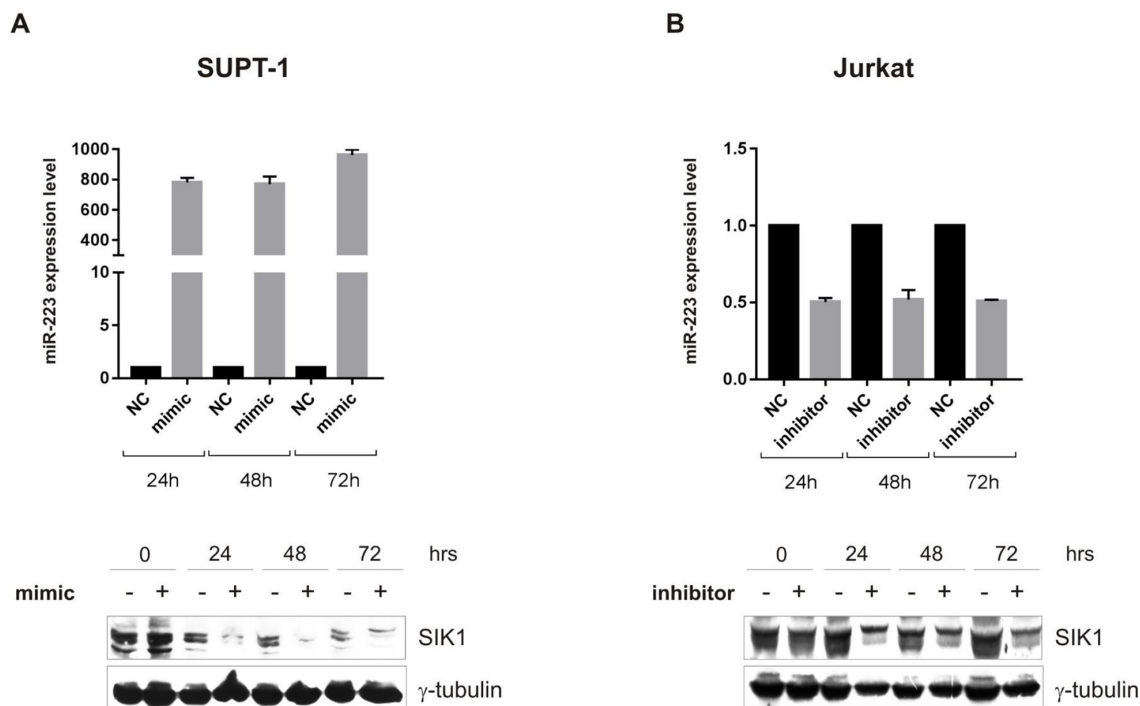

**Supplementary Figure 3: Expression of miR-223 and SIK1 post-transfection of SUPT-1 and Jurkat cell lines.** (A) SUPT-1 and (B) Jurkat were transfected with pre-miR-223 (mimic) and anti-miR-223 (inhibitor), respectively. At the top, expression levels of miR-223 in SUPT-1 and Jurkat cell lines measured by qRT-PCR at indicated post-transfection time points. Data have been calculated according to the comparative delta Ct method ( $2^{-\Delta\Delta C_t}$ ), using RNU6 as endogenous control. Data mean ( $n=3 \pm SEM$ ) were compared to that of cells transfected with relative negative control (NC). Below, the Western blotting analysis of SIK-1 in SUPT-1 and Jurkat cell lines at indicated post-transfection time points;  $\gamma$ -tubulin was used as loading control.

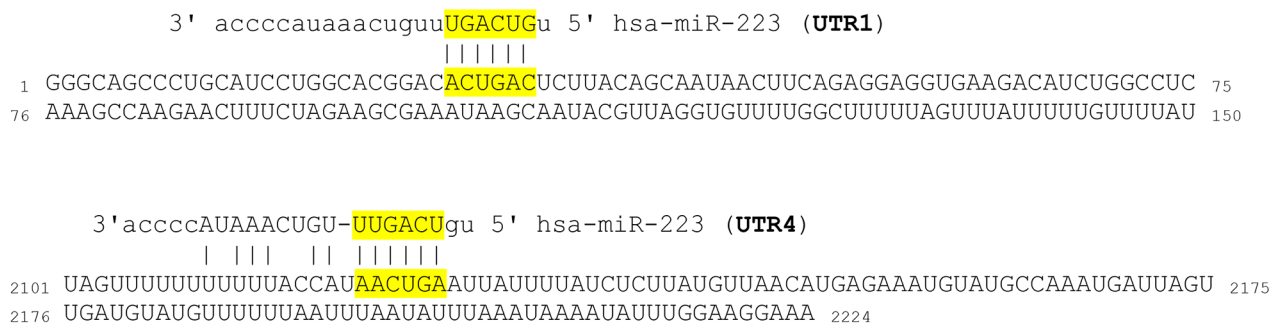

**Supplementary Figure 4: miR-223 binding sites on 3'-UTR sequence of SIK1.** Two putative binding sequences, named UTR1 and UTR4, have been predicted by using on-line tool at <http://www.microna.org/>. The whole UTR sequence, including portions UTR2 and UTR3 comprised between UTR1 and UTR4, has been subcloned into pmirGLO reporter plasmid and tested by luciferase assay.

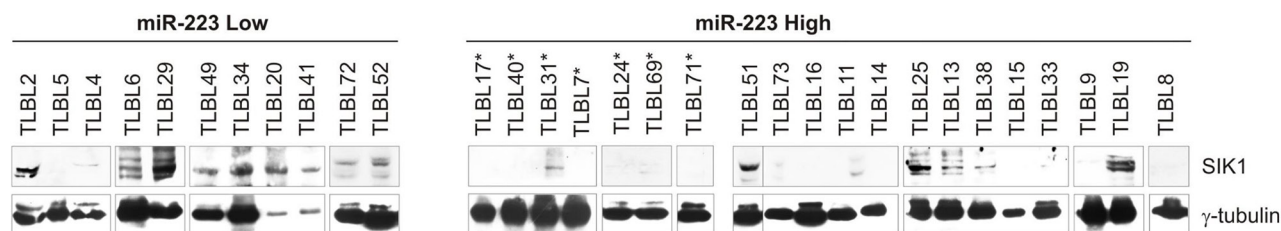

**Supplementary Figure 5: SIK1 expression in T-LBL primary tumors, according to miR-223 expression levels.** Vertical lines have been inserted to indicate repositioned gel lanes. The membranes were probed for  $\gamma$ -tubulin as loading control. Relapsed patients are indicated with \*.

**Supplementary Table 1: Clinical features of T-LBL clinical cohort.**

See Supplementary File 1

**Supplementary Table 2: List of NOTCH1 mutations identified in 35 T-LBL patients. Sequence numbering is based on GenBank accessions NM\_017617.4 and NP\_060087.3.**

See Supplementary File 2
